# Supplementary material for: Natural Genetic Variation of Xanthomonas campestris pv. campestris Pathogenicity on Arabidopsis Revealed by Association and Reverse Genetics
Source: PubMed Central journal article supplement — mBio. 2013 Jun 4;4(3):e00538-12. doi: 10.1128/mBio.00538-12 (PMC3685212; doi:10.1128/mbio.00538-12), 2013-06-04
Supplement: mbo003131533sf01.pdf [file mbo003131533sf01.pdf]

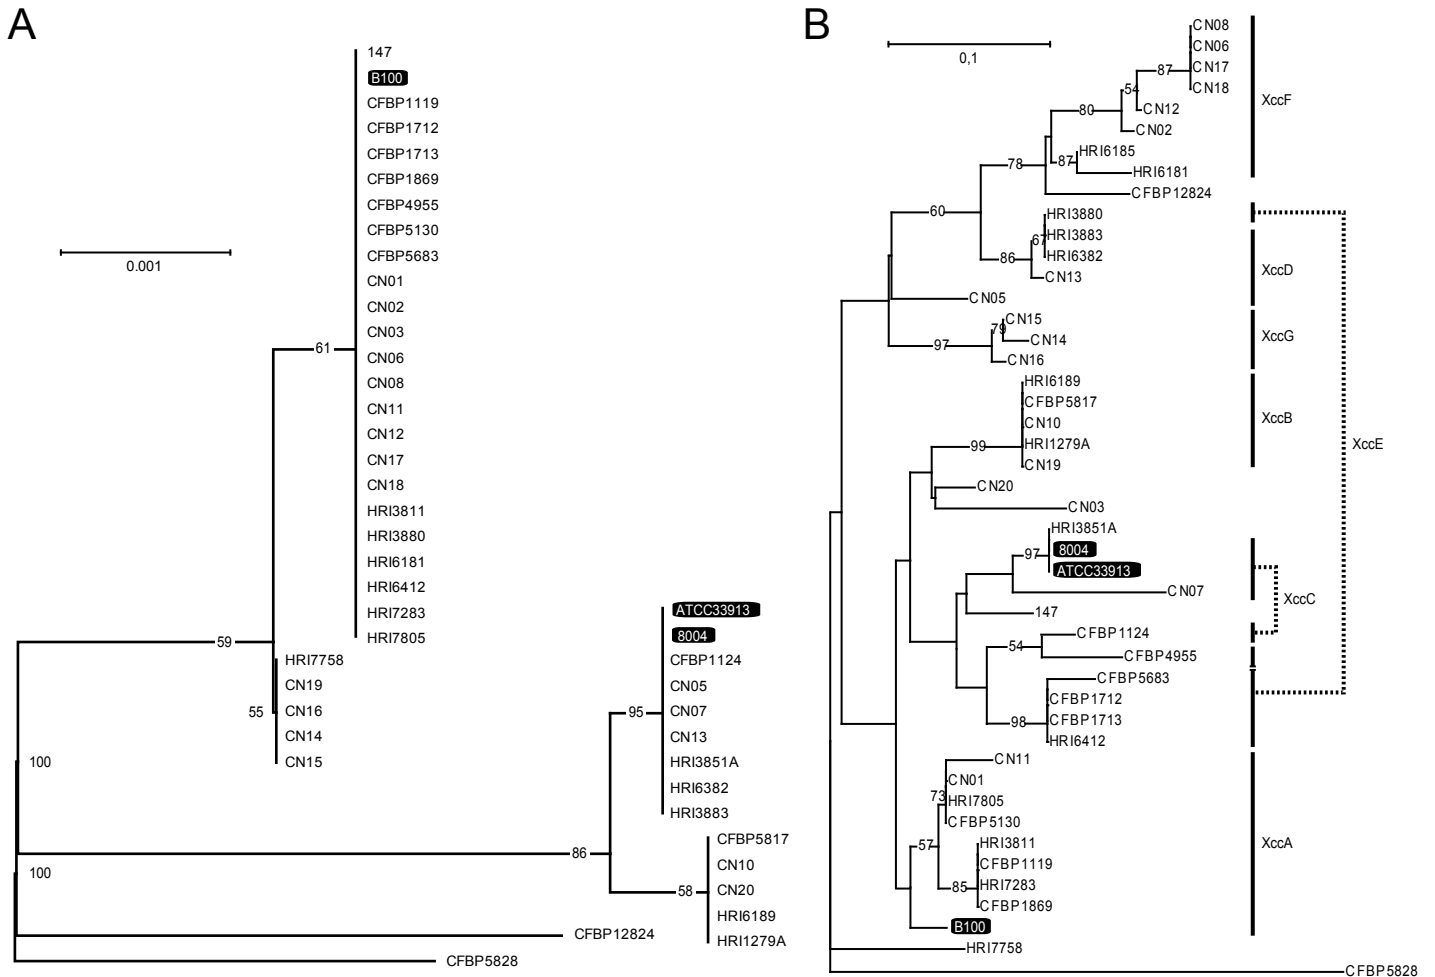

**Figure S1:** Relationships between *Xcc* strains analysed by MLSA or based on diversity of the type III secretomes. (A) Neighbor-joining tree of the concatenated sequences of *efP* and *glnA*. (B) Dice similarity indices calculated from presence/absence of gene coding for type III secreted proteins were used to construct a neighbor-joining tree showing the genetic relationships between *Xcc* predicted type III secretomes. Bootstrap values higher than 40% are indicated. *Xcc* strains which genome sequence is available are boxed in black. On the right, brackets indicate AFLP-based subgroups of *Xcc* (Figure 1). *X. campestris* pv. *raphani* strain CFBP5828 was used to root the tree.

Figure S1  
 Guy et al.
