# Supplementary material for: Natural Genetic Variation of Xanthomonas campestris pv. campestris Pathogenicity on Arabidopsis Revealed by Association and Reverse Genetics
Source: PubMed Central journal article supplement — mBio. 2013 Jun 4;4(3):e00538-12. doi: 10.1128/mBio.00538-12 (PMC3685212; doi:10.1128/mbio.00538-12), 2013-06-04
Supplement: mbo003131533sf02.pdf [file mbo003131533sf02.pdf]

Non eliciting Flg22

|                                  |                                                                                                                                                                                    |
|----------------------------------|------------------------------------------------------------------------------------------------------------------------------------------------------------------------------------|
| All Xcc (n=43) but HRI6185 (98%) | AQRNLNTNS <b>S</b> SM <b>A</b> L <b>S</b> IQ <b>Q</b> LSSG <b>K</b> R <b>I</b> T <b>S</b> A <b>S</b> VDAAGLAISERF <b>T</b> TQIRGLDVASRNANDGISLAQTAE <b>G</b> AMVEIG <b>N</b> NLQRI |
| Xcc HRI6185 and Xcr CFBP5828     | AQRNLNTSSASM <b>Q</b> T <b>S</b> I <b>Q</b> RLSSGLRINS <b>A</b> K <b>D</b> DAAGLAISERF <b>T</b> TQIRGLDVASRNANDGISLAQTAE <b>G</b> AMVEIG <b>S</b> NLQRI                            |

Eliciting Flg22

**Figure S2:** FliC amino-acids 14 to 92 were deduced by partial *fliC* sequencing in the 45 Xcc and 1 Xcr strains studied (Table 1). Amino-acid differences are boxed in black. Position of the Flg22 peptide potentially recognized by Arabidopsis FLS2 receptor is indicated. Eliciting and non-eliciting allelic variants of FliC are indicated including the critical residue D43 (red asterisk) essential for recognition (28).

Figure S2  
Guy *et al.*
