# Supplementary material for: Natural Genetic Variation of Xanthomonas campestris pv. campestris Pathogenicity on Arabidopsis Revealed by Association and Reverse Genetics
Source: PubMed Central journal article supplement — mBio. 2013 Jun 4;4(3):e00538-12. doi: 10.1128/mBio.00538-12 (PMC3685212; doi:10.1128/mbio.00538-12), 2013-06-04
Supplement: mbo003131533sf03.pdf [file mbo003131533sf03.pdf]

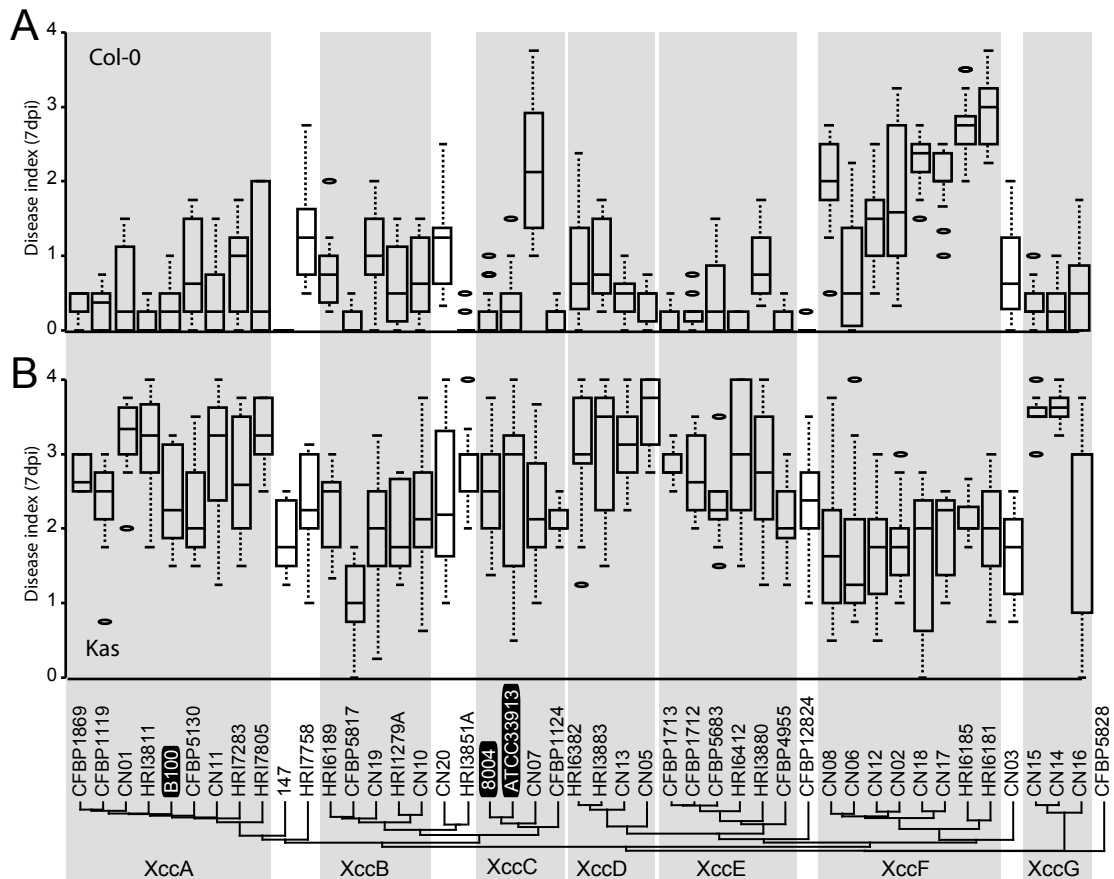

**Figure S3:** Boxplot representation of pathogenicity of 45 *Xcc* strains on Col-0 (A) and Kas (B) ecotypes of *Arabidopsis thaliana* was assayed by piercing in the central vein and infection symptoms scored 7 days post inoculation. Disease index indicates: 0-1 no symptoms; 1-2 weak chlorosis, 2-3 strong chlorosis; 3-4 necrosis. Experiment performed at least in triplicates and 16 independent blocks. Each time at least 4 plants were inoculated on at least 3 leaves.

Figure S3  
Guy *et al.*
