# Supplementary material for: Natural Genetic Variation of Xanthomonas campestris pv. campestris Pathogenicity on Arabidopsis Revealed by Association and Reverse Genetics
Source: PubMed Central journal article supplement — mBio. 2013 Jun 4;4(3):e00538-12. doi: 10.1128/mBio.00538-12 (PMC3685212; doi:10.1128/mbio.00538-12), 2013-06-04
Supplement: mbo003131533sf04.pdf [file mbo003131533sf04.pdf]

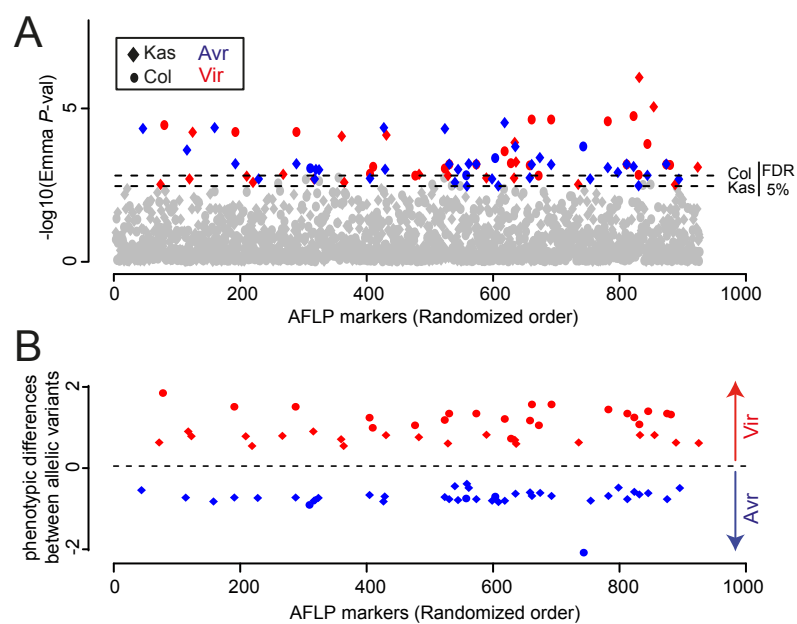

**Figure S4:** Association study results 7 days after inoculation on Col-0 (dot) and Kas (Diamond). (A)  $-\log_{10}$  of the  $P$ -values from association test among the AFLP markers (randomized ordered along the x axis). (B) Average phenotypic differences measured between the two alleles at each significant AFLP marker. The significant markers (FDR at 5%) and their respective effects are in red (pathogenicity effect) or blue (avirulence effect). Dashed lines indicate  $q$ -values.

Figure S4  
Guy *et al.*
