# Supplementary material for: Natural Genetic Variation of Xanthomonas campestris pv. campestris Pathogenicity on Arabidopsis Revealed by Association and Reverse Genetics
Source: PubMed Central journal article supplement — mBio. 2013 Jun 4;4(3):e00538-12. doi: 10.1128/mBio.00538-12 (PMC3685212; doi:10.1128/mbio.00538-12), 2013-06-04
Supplement: mbo003131533sf05.pdf [file mbo003131533sf05.pdf]

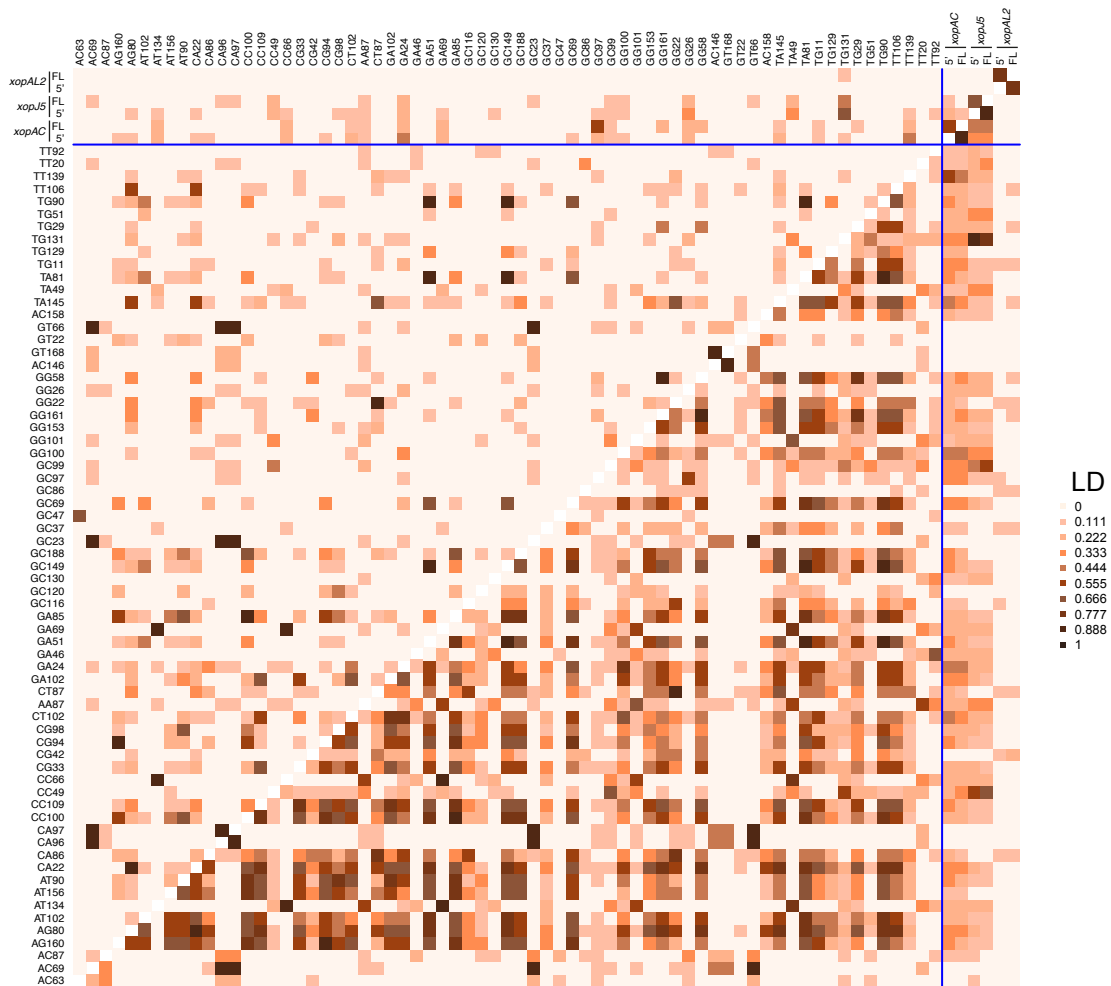

**Figure S5:** Pairwise linkage disequilibrium among all significant markers (N=73) after EMMA at 7dpi with the T3SP PCR markers demarcated from AFLP markers by blue lines ( $R^2$  under the diagonal,  $R^2V$  above the diagonal).
