# Supplementary material for: Natural Genetic Variation of Xanthomonas campestris pv. campestris Pathogenicity on Arabidopsis Revealed by Association and Reverse Genetics
Source: PubMed Central journal article supplement — mBio. 2013 Jun 4;4(3):e00538-12. doi: 10.1128/mBio.00538-12 (PMC3685212; doi:10.1128/mbio.00538-12), 2013-06-04
Supplement: mbo003131533sf06.pdf [file mbo003131533sf06.pdf]

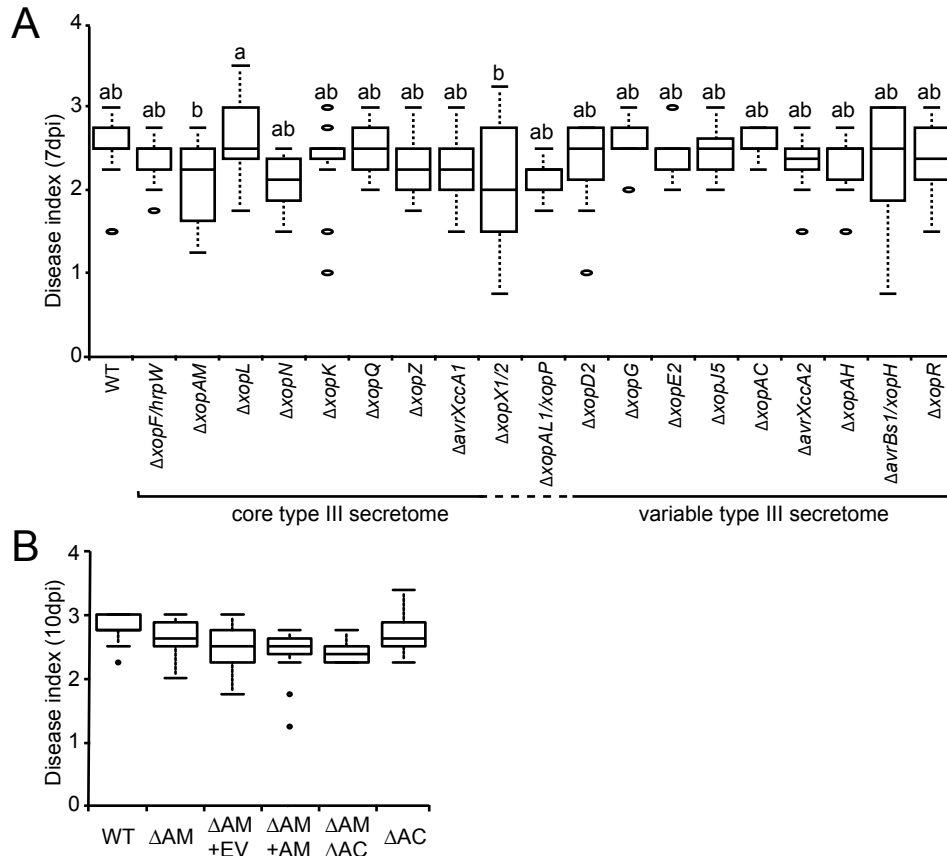

**Figure S6:** Pathogenicity of T3SP mutants in *Xcc* strain 8004 10 days post inoculation of *Arabidopsis* plants of the Kas ecotype. Bacteria were inoculated by piercing in the central vein and infection symptoms scored over 10 days. Disease index indicates: 0-1 no symptoms; 1-2 weak chlorosis, 2-3 strong chlorosis; 3-4 necrosis. Boxplot representation of symptoms: middle bar = median; box limit = upper and lower quartile; extremes = Min and Max values. (A) Inoculation of single mutants. (B) Complementation of the *xopAM* mutant ( $\Delta AM$ ) by pFAJ1700-*xopAM* ( $\Delta AM+AM$ ) and phenotypes of the double *xopAM-xopAC* deletion mutant ( $\Delta AM\Delta AC$ ) and *xopAC* mutant ( $\Delta AC$ ). EV: empty vector. Statistical groups were determined using a Kruskal-Wallis test ( $P < 0.001$ ) and indicated by different letters.
