# Supplementary material for: Natural Genetic Variation of Xanthomonas campestris pv. campestris Pathogenicity on Arabidopsis Revealed by Association and Reverse Genetics
Source: PubMed Central journal article supplement — mBio. 2013 Jun 4;4(3):e00538-12. doi: 10.1128/mBio.00538-12 (PMC3685212; doi:10.1128/mbio.00538-12), 2013-06-04
Supplement: mbo003131533st1.pdf [file mbo003131533st1.pdf]

**Table S1:** Genotype and origin of natural strains of *Xanthomonas campestris* used in this study.

| Strains (Other names)                               | Race <sup>a</sup> | Plasmids (kb)   | Allelic profiles <sup>b</sup>                 | Isolation <sup>c</sup> | Reference or source <sup>d</sup> |                        |
|-----------------------------------------------------|-------------------|-----------------|-----------------------------------------------|------------------------|----------------------------------|------------------------|
| <i>Xanthomonas campestris</i> pv. <i>campestris</i> |                   |                 | <i>efp-glnA</i> Host                          | Country                | Year                             |                        |
| 147 (HRI3964)                                       | 4                 | nd <sup>f</sup> | 6-1 <i>B. oleracea</i>                        | Brazil                 | -                                | LIPM, Toulouse, France |
| 8004 (LMG8004, HRI3961, NCPPB1145)                  | 9                 | -               | 6-10 <i>B. oleracea</i> var. <i>botrytis</i>  | UK                     | 1912                             | (62)                   |
| ATCC33913 (CFBP5241, LMG568)                        | 3                 | -               | 6-10 <i>B. oleracea</i> var. <i>gemmifera</i> | UK                     | 1957                             | (9)                    |
| B100                                                | - <sup>e</sup>    | -               | 6-1 -                                         | -                      | -                                | (11)                   |
| CFBP1119                                            | 1                 | nd              | 6-1 <i>B. oleracea</i> var. <i>botrytis</i>   | France                 | 1967                             | CFBP                   |
| CFBP1124 (LMG8032)                                  | 8                 | 35              | 6-10 <i>B. oleracea</i> var. <i>botrytis</i>  | France                 | 1967                             | CFBP                   |
| CFBP12824                                           | 2                 | nd              | 6-12 <i>B. oleracea</i> var. <i>capitata</i>  | Netherlands            | -                                | CFBP                   |
| CFBP1712 (LMG8034)                                  | 5                 | nd              | 6-1 <i>B. oleracea</i> var. <i>capitata</i>   | France                 | 1975                             | CFBP                   |
| CFBP1713                                            | 5                 | nd              | 6-1 <i>B. oleracea</i> var. <i>botrytis</i>   | France                 | 1975                             | CFBP                   |
| CFBP1869 (LMG8035)                                  | 1                 | nd              | 6-1 <i>B. oleracea</i> var. <i>botrytis</i>   | Ivory cost             | 1976                             | CFBP                   |
| CFBP4955                                            | 9                 | 180             | 6-1 <i>B. oleracea</i> var. <i>botrytis</i>   | Belgium                | 1999                             | CFBP                   |
| CFBP5130 (SNES3430)                                 | 7                 | nd              | 6-1 <i>B. oleracea</i>                        | -                      | 2000                             | CFBP                   |
| CFBP5683                                            | 3                 | nd              | 6-1 <i>B. oleracea</i>                        | France                 | 1979                             | CFBP                   |
| CFBP5817 (Clause 658pCS1)                           | 4                 | 32              | 4-10 <i>B. oleracea</i> var. <i>botrytis</i>  | Chile                  | 2001                             | CFBP                   |
| CN01                                                | -                 | nd              | 6-1 <i>B. rapa</i> subsp. <i>pekinensis</i>   | China                  | 2002                             | (27)                   |
| CN02                                                | -                 | nd              | 6-1 <i>B. rapa</i> subsp. <i>pekinensis</i>   | China                  | 2002                             | (27)                   |
| CN03                                                | -                 | 70              | 6-1 <i>B. rapa</i> subsp. <i>pekinensis</i>   | China                  | 2002                             | (27)                   |
| CN05                                                | -                 | 180             | 6-10 <i>B. rapa</i> subsp. <i>pekinensis</i>  | China                  | 2002                             | (27)                   |
| CN06                                                | -                 | 105             | 6-1 <i>B. rapa</i> subsp. <i>pekinensis</i>   | China                  | 2002                             | (27)                   |
| CN07                                                | -                 | 39              | 6-10 <i>B. rapa</i> subsp. <i>pekinensis</i>  | China                  | 2002                             | (27)                   |
| CN08                                                | -                 | 50              | 6-1 <i>R. sativus longipinnatus</i>           | China                  | 2002                             | (27)                   |
| CN10                                                | -                 | 35              | 4-10 <i>B. rapa</i> subsp. <i>pekinensis</i>  | China                  | 2002                             | (27)                   |
| CN11                                                | -                 | 35              | 6-1 <i>B. oleracea</i> var. <i>capitata</i>   | China                  | 2002                             | (27)                   |
| CN12                                                | -                 | nd              | 6-1 <i>B. napus</i> subsp. <i>oleifera</i>    | China                  | 2002                             | (27)                   |
| CN13                                                | -                 | 195             | 6-10 -                                        | -                      | -                                | (27)                   |
| CN14                                                | -                 | 20/50           | 4-1 <i>B. juncea</i> var. <i>foliosa</i>      | China                  | 2003                             | (27)                   |

|                                |   |        |      |                                           |              |      |      |
|--------------------------------|---|--------|------|-------------------------------------------|--------------|------|------|
| CN15                           | - | 20/50  | 4-1  | <i>B. rapa</i> subsp. <i>chinensis</i>    | China        | 2003 | (27) |
| CN16                           | - | 20/50  | 4-1  | <i>B. rapa</i> subsp. <i>pekinensis</i>   | China        | 2003 | (27) |
| CN17                           | - | nd     | 6-1  | <i>B. rapa</i> subsp. <i>chinensis</i>    | China        | 2003 | (27) |
| CN18                           | - | 50     | 6-1  | <i>B. juncea</i> var. <i>foliosa</i>      | China        | 2003 | (27) |
| CN19                           | - | 35     | 4-1  | -                                         | -            | -    | (27) |
| CN20                           | - | 180    | 4-10 | <i>B. oleracea</i> var. <i>alboglabra</i> | China        | 2003 | (27) |
| HRI1279A                       | 4 | 37     | 4-10 | <i>B. oleracea</i> var. <i>capitata</i>   | UK           | 1984 | (13) |
| HRI3811 (P. Williams; PHW1205) | 1 | 35     | 6-1  | <i>B. oleracea</i>                        | USA          | -    | (13) |
| HRI3851A (C. Grimm; Xcc168)    | 3 | nd     | 6-10 | <i>B. oleracea</i> var. <i>botrytis</i>   | Greece       | 1989 | (13) |
| HRI3880 (NCPBP2986)            | 5 | 70     | 6-1  | <i>B. oleracea</i> var. <i>capitata</i>   | Australia    | 1975 | (13) |
| HRI3883 (NCPBP1946)            | 5 | 210    | 6-10 | <i>R. sativus</i>                         | USA          | 1966 | (13) |
| HRI6181 (J. Vicente; Xcc551)   | 6 | 50     | 6-1  | <i>B. rapa</i>                            | Portugal     | 1996 | (13) |
| HRI6185 (J. Vicente; Xcc555)   | 6 | nd     | 6-1  | <i>B. rapa</i>                            | Portugal     | 1996 | (13) |
| HRI6189 (J. Vicente; Xcc559)   | 4 | nd     | 4-10 | <i>B. oleracea</i> var. <i>italica</i>    | Portugal     | 1996 | (13) |
| HRI6382 (NCPBP1711)            | 5 | 195    | 6-10 | <i>B. rapa</i>                            | Canada       | 1953 | (13) |
| HRI6412 (D. Silué; 1713)       | 3 | nd     | 6-1  | <i>B. oleracea</i> var. <i>botrytis</i>   | France       | 1997 | (13) |
| HRI7283                        | 1 | 37/195 | 6-1  | cruciferous weed                          | UK           | 1997 | (13) |
| HRI7758                        | 4 | nd     | 4-1  | <i>B. oleracea</i> var. <i>trunchuda</i>  | Brazil       | 1999 | (13) |
| HRI7805 (K. Serfontein; BD102) | 1 | nd     | 6-1  | <i>B. oleracea</i> var. <i>botrytis</i>   | South Africa | 1998 | (13) |

*Xanthomonas campestris* pv. *raphani*

|          |    |    |     |                         |     |   |      |
|----------|----|----|-----|-------------------------|-----|---|------|
| CFBP1228 | 3R | nd | 4-3 | <i>Raphanus sativus</i> | USA | - | CFBP |
|----------|----|----|-----|-------------------------|-----|---|------|

<sup>a</sup> as determined (13, 14)

<sup>b</sup> according to the haplotypes defined (26)

<sup>c</sup> host plant, country and year of isolation

<sup>d</sup> CFBP, Collection Française de Bactéries Phytopathogènes, Angers, France; HRI-W, Horticulture Research International, Wellesbourne, UK.

<sup>e</sup> unknown

<sup>f</sup> Estimated plasmid sizes in kb; -: absent; nd: not detected.
